# Supplementary material for: Phylogenetic Placement of the Plesioclytini (Coleoptera: Cerambycidae: Cerambycinae)
Source: MDPI journal article supplement (doi:10.3390/d13110597), 2021-11-20
Supplement: s1 [file s1]

| Subfamily    | Tribe           | Species                           | COI        | 16S        | 18S        | 28S        | wingless   |
|--------------|-----------------|-----------------------------------|------------|------------|------------|------------|------------|
| Cerambycinae | Anaglyptini     | <i>Anaglyptus colobotheoides</i>  | MN905181.1 | -          | MN850881.1 | MN850976.1 | MN852580.1 |
| Cerambycinae | Anaglyptini     | <i>Anaglyptus mysticus</i>        | MN905185.1 | MN851086.1 | MN850885.1 | MN850980.1 | MN852584.1 |
| Cerambycinae | Callichromatini | <i>Aromia bungii</i>              | MN905189.1 | KF737727.1 | MN850889.1 | MN850985.1 | MN852589.1 |
| Cerambycinae | Callichromatini | <i>Chelidonium binotaticolle</i>  | MN905195.1 | MN851097.1 | MN850896.1 | MN850992.1 | MN852596.1 |
| Cerambycinae | Callichromatini | <i>Chelidonium quadricolle</i>    | MN905251.1 | -          | HQ630653.1 | MN851056.1 | MN852657.1 |
| Cerambycinae | Callichromatini | <i>Chloridolum japonicum</i>      | MN905196.1 | MN851098.1 | MN850897.1 | MN850993.1 | MN852597.1 |
| Cerambycinae | Callichromatini | <i>Chloridolum sieversi</i>       | MN905197.1 | MN851099.1 | MN850898.1 | MN850994.1 | MN852598.1 |
| Cerambycinae | Callichromatini | <i>Polyzonus fasciatus</i>        | MN905244.1 | MN851144.1 | MN850946.1 | MN851044.1 | MN852646.1 |
| Cerambycinae | Callichromatini | <i>Schwarzerium provostii</i>     | MN905250.1 | MN851153.1 | MN850957.1 | MN851055.1 | MN852656.1 |
| Cerambycinae | Callidiini      | <i>Callidium aeneum</i>           | MN905192.1 | MN851093.1 | MN850892.1 | MN850988.1 | MN852592.1 |
| Cerambycinae | Callidiini      | <i>Oupyrhridium cinnabarinum</i>  | MN905232.1 | MN851133.1 | MN850934.1 | MN851032.1 | MN852634.1 |
| Cerambycinae | Callidiini      | <i>Phymatodes ermolenkoi</i>      | MN905238.1 | -          | MN850940.1 | MN851038.1 | MN852640.1 |
| Cerambycinae | Callidiini      | <i>Phymatodes maaki</i>           | MN905239.1 | MN851139.1 | MN850941.1 | MN851039.1 | MN852641.1 |
| Cerambycinae | Callidiini      | <i>Phymatodes mediofasciatus</i>  | MN905240.1 | MN851140.1 | MN850942.1 | MN851040.1 | MN852642.1 |
| Cerambycinae | Callidiini      | <i>Phymatodes testaceus</i>       | MN905241.1 | MN851141.1 | MN850943.1 | MN851041.1 | MN852643.1 |
| Cerambycinae | Callidiini      | <i>Semanotus bifasciatus</i>      | MN905253.1 | MN851156.1 | MN850960.1 | MN851058.1 | MN852659.1 |
| Cerambycinae | Callidiopini    | <i>Ceresium longicorne</i>        | MN905194.1 | MN851095.1 | MN850894.1 | MN850990.1 | MN852594.1 |
| Cerambycinae | Callidiopini    | <i>Ceresium sinicum</i>           | KF247266.1 | MN851096.1 | MN850895.1 | MN850991.1 | MN852595.1 |
| Cerambycinae | Callidiopini    | <i>Stenygrinum quadrinotatum</i>  | MN905258.1 | MN851161.1 | MN850965.1 | MN851063.1 | MN852664.1 |
| Cerambycinae | Cerambycini     | <i>Cyriopalus wallacei</i>        | MN905199.1 | MN851101.1 | MN850900.1 | MN850996.1 | MN852600.1 |
| Cerambycinae | Cerambycini     | <i>Margites fulvidus</i>          | MN905215.1 | MN851117.1 | MN850917.1 | MN851014.1 | MN852617.1 |
| Cerambycinae | Cerambycini     | <i>Massicus raddei</i>            | MN796169.1 | HM034787.1 | KF141983.1 | -          | -          |
| Cerambycinae | Cerambycini     | <i>Nadezhdiella cantori</i>       | KF737795.1 | KF737732.1 | KF141990.1 | -          | -          |
| Cerambycinae | Cerambycini     | <i>Neocerambyx raddei</i>         | -          | MN851125.1 | MN850925.1 | MN851022.1 | MN852624.1 |
| Cerambycinae | Cerambycini     | <i>Neoplocaederus bicolor</i>     | MN905224.1 | -          | -          | MN851024.1 | MN852626.1 |
| Cerambycinae | Cerambycini     | <i>Pseudaolesthes chrysothrix</i> | -          | KF737726.1 | KF142005.1 | MN850975.1 | MN852579.1 |
| Cerambycinae | Cerambycini     | <i>Rhytidodera bowringii</i>      | KF737796.1 | KF737733.1 | KF141994.1 | -          | -          |
| Cerambycinae | Cerambycini     | <i>Rhytidodera integra</i>        | -          | MN851150.1 | MN850954.1 | MN851052.1 | MN852653.1 |
| Cerambycinae | Cerambycini     | <i>Trachylophus sinensis</i>      | -          | KF737734.1 | KF141967.1 | -          | -          |
| Cerambycinae | Cerambycini     | <i>Trirachys orientalis</i>       | KF737798.1 | KF737735.1 | KF141984.1 | -          | -          |
| Cerambycinae | Cleomenini      | <i>Artimpaza patruelis</i>        | MN905190.1 | MN851091.1 | MN850890.1 | MN850986.1 | MN852590.1 |
| Cerambycinae | Cleomenini      | <i>Nida flavovittata</i>          | MN905225.1 | MN851126.1 | MN850927.1 | MN851025.1 | MN852627.1 |
| Cerambycinae | Clytini         | <i>Chlorophorus diadema</i>       | KC135923.1 | AF332934.1 | -          | -          | -          |
| Cerambycinae | Clytini         | <i>Chlorophorus miwai</i>         | KF737800.1 | KF737737.1 | KF141980.1 | -          | -          |
| Cerambycinae | Clytini         | <i>Chlorophorus similimus</i>     | KF737801.1 | KF737738.1 | KC413731.1 | -          | -          |
| Cerambycinae | Clytini         | <i>Clytus arietis</i>             | JF889522.1 | -          | JN619110.1 | -          | -          |
| Cerambycinae | Clytini         | <i>Clytus raddensis</i>           | MN905198.1 | -          | -          | -          | MN852599.1 |
| Cerambycinae | Clytini         | <i>Clytus sp</i>                  | KF737802.1 | KF737739.1 | KF141981.1 | -          | -          |
| Cerambycinae | Clytini         | <i>Cyrtoclytus capra</i>          | MN905200.1 | HM034781.1 | MN850901.1 | MN850997.1 | MN852601.1 |
| Cerambycinae | Clytini         | <i>Cyrtoclytus monticallisis</i>  | MN905201.1 | -          | -          | MN850998.1 | MN852602.1 |
| Cerambycinae | Clytini         | <i>Demonax seoulensis</i>         | MN905202.1 | -          | MN850903.1 | MN850999.1 | MN852603.1 |
| Cerambycinae | Clytini         | <i>Demonax transilis</i>          | MN905203.1 | AF332933.1 | MN850904.1 | MN851000.1 | MN852604.1 |
| Cerambycinae | Clytini         | <i>Laodemonax forticornis</i>     | MN905213.1 | -          | MN850914.1 | MN851011.1 | MN852614.1 |
| Cerambycinae | Clytini         | <i>Neoclytus acuminatus</i>       | KR490676.1 | DQ417765.1 | -          | -          | -          |
| Cerambycinae | Clytini         | <i>Neoclytus mucronatus</i>       | MN905223.1 | -          | MN850926.1 | -          | MN852625.1 |
| Cerambycinae | Clytini         | <i>Perissus fairmairei</i>        | MN905234.1 | MN851135.1 | MN850936.1 | MN851034.1 | MN852636.1 |
| Cerambycinae | Clytini         | <i>Perissus kimi</i>              | MN905235.1 | -          | MN850937.1 | MN851035.1 | MN852637.1 |
| Cerambycinae | Clytini         | <i>Plagionotus christophi</i>     | MN905242.1 | MN851142.1 | MN850944.1 | MN851042.1 | MN852644.1 |
| Cerambycinae | Clytini         | <i>Plagionotus pulcher</i>        | MN905243.1 | -          | MN850945.1 | MN851043.1 | MN852645.1 |
| Cerambycinae | Clytini         | <i>Rhabdoclytus acutivittis</i>   | MN905210.1 | -          | MN850910.1 | MN851007.1 | MN852610.1 |

| Subfamily    | Tribe          | Species                             | COI        | 16S        | 18S        | 28S        | wingless   |
|--------------|----------------|-------------------------------------|------------|------------|------------|------------|------------|
| Cerambycinae | Clytini        | <i>Rhaphuma diminuta</i>            | MN905246.1 | MN851148.1 | MN850952.1 | MN851050.1 | MN852651.1 |
| Cerambycinae | Clytini        | <i>Rhaphuma elongata</i>            | KF737803.1 | KF737740.1 | KF141976.1 | -          | -          |
| Cerambycinae | Clytini        | <i>Rhaphuma gracilipes</i>          | MW085313.1 | MN851149.1 | MN850953.1 | MN851051.1 | MN852652.1 |
| Cerambycinae | Clytini        | <i>Sclethrus stenocylindrus</i>     | MN905252.1 | MN851155.1 | MN850959.1 | MN851057.1 | MN852658.1 |
| Cerambycinae | Clytini        | <i>Teratoclytus plavilstshikovi</i> | KF737804.1 | MN851163.1 | MN850967.1 | MN851065.1 | MN852666.1 |
| Cerambycinae | Clytini        | <i>Xylotrechus grayii</i>           | MN905261.1 | MN851165.1 | MN850969.1 | MN851067.1 | MN852668.1 |
| Cerambycinae | Clytini        | <i>Xylotrechus khampaseuthi</i>     | MN905262.1 | MN851166.1 | MN850970.1 | MN851068.1 | MN852669.1 |
| Cerambycinae | Clytini        | <i>Xylotrechus pyrrhoderus</i>      | KF737805.1 | -          | KF141975.1 | -          | -          |
| Cerambycinae | Clytini        | <i>Xylotrechus resticus</i>         | KM286086.1 | JX177496.1 | -          | -          | -          |
| Cerambycinae | Clytini        | <i>Xylotrechus rufilius</i>         | KY357549.1 | -          | MN850971.1 | MN851069.1 | MN852670.1 |
| Cerambycinae | Clytini        | <i>Xylotrechus salicis</i>          | MN905264.1 | MN851167.1 | MN850972.1 | MN851070.1 | MN852671.1 |
| Cerambycinae | Clytini        | <i>Xylotrechus yanoi</i>            | MN905265.1 | MN851168.1 | MN850973.1 | MN851071.1 | MN852672.1 |
| Cerambycinae | Compsocerini   | <i>Rosalia coelestis</i>            | MN905248.1 | MN851151.1 | MN850955.1 | MN851053.1 | MN852654.1 |
| Cerambycinae | Compsocerini   | <i>Rosalia pachycornis</i>          | MN905249.1 | MN851152.1 | MN850956.1 | MN851054.1 | MN852655.1 |
| Cerambycinae | Eburiini       | <i>Eburia quadrigeminata</i>        | -          | DQ417764.1 | -          | -          | -          |
| Cerambycinae | Eburiini       | <i>Eburia sp.</i>                   | -          | MH011397.1 | AF267402.1 | -          | -          |
| Cerambycinae | Elaphidiini    | <i>Anelaphus sp.</i>                | MN905186.1 | MN851087.1 | MN850886.1 | MN850981.1 | MN852585.1 |
| Cerambycinae | Elaphidiini    | <i>Anelaphus villosus</i>           | MN905187.1 | MN851088.1 | MN850887.1 | MN850982.1 | MN852586.1 |
| Cerambycinae | Elaphidiini    | <i>Elaphidion mucronatus</i>        | HM433497.1 | AJ841404.1 | AJ841525.1 | -          | -          |
| Cerambycinae | Hesperophanini | <i>Gnatholea eburifera</i>          | MN905207.1 | MN851109.1 | MN850908.1 | MN851004.1 | MN852608.1 |
| Cerambycinae | Hesperophanini | <i>Gnatholea simplex</i>            | MN905208.1 | MN851110.1 | MW984008.1 | MN851005.1 | MN852609.1 |
| Cerambycinae | Hesperophanini | <i>Stromatium longicorne</i>        | MN905259.1 | MN851162.1 | MN850966.1 | MN851064.1 | MN852665.1 |
| Cerambycinae | Heteropsini    | <i>Aridaeus heros</i>               | MN905188.1 | MN851090.1 | MN850888.1 | MN850984.1 | MN852588.1 |
| Cerambycinae | Hylotrupini    | <i>Hylotrupes bajulus</i>           | GU003930.1 | MN851112.1 | MN850911.1 | MN851008.1 | MN852611.1 |
| Cerambycinae | Molorchini     | <i>Molorchus minor</i>              | MN905219.1 | MN851121.1 | MN850921.1 | MN851018.1 | MN852621.1 |
| Cerambycinae | Molorchini     | <i>Molorchus nitidus</i>            | MN905220.1 | MN851122.1 | MN850922.1 | MN851019.1 | MN852622.1 |
| Cerambycinae | Obriini        | <i>Obrium brevicorne</i>            | MN905229.1 | MN851130.1 | MN850931.1 | MN851029.1 | MN852631.1 |
| Cerambycinae | Oemini         | <i>Oemospila maculipennis</i>       | MN905231.1 | MN851132.1 | MN850933.1 | MN851031.1 | MN852633.1 |
| Cerambycinae | Phoracanthini  | <i>Allotraeus asiaticus</i>         | KF737808.1 | KF737745.1 | KF141989.1 | -          | -          |
| Cerambycinae | Phoracanthini  | <i>Allotraeus orientalis</i>        | MN905227.1 | MN851128.1 | MN850929.1 | MN851027.1 | MN852629.1 |
| Cerambycinae | Phoracanthini  | <i>Allotraeus rudescens</i>         | MN905228.1 | MN851129.1 | MN850930.1 | MN851027.1 | MN852630.1 |
| Cerambycinae | Phoracanthini  | <i>Allotraeus sphaerioninus</i>     | MN905182.1 | MN851085.1 | MN850882.1 | MN850977.1 | MN852581.1 |
| Cerambycinae | Pyrestini      | <i>Pyrestes haematicus</i>          | -          | MN851147.1 | MN850951.1 | MN851049.1 | -          |
| Cerambycinae | Pyrestini      | <i>Pyrestes rugicollis</i>          | MW984124.1 | -          | KF141991.1 | -          | -          |
| Cerambycinae | Stenhomalini   | <i>Stenhomalus japonicus</i>        | MN905254.1 | MN851157.1 | MN850961.1 | MN851059.1 | MN852660.1 |
| Cerambycinae | Stenhomalini   | <i>Stenhomalus taiwanus</i>         | MN905255.1 | MN851158.1 | MN850962.1 | MN851060.1 | MN852661.1 |
| Cerambycinae | Stenopterini   | <i>Kunbir sp.</i>                   | MN905211.1 | MN851113.1 | MN850912.1 | MN851009.1 | MN852612.1 |
| Cerambycinae | Stenopterini   | <i>Merionoeda baoshana</i>          | MN905217.1 | MN851119.1 | MN850919.1 | MN851016.1 | MN852619.1 |
| Cerambycinae | Stenopterini   | <i>Merionoeda eburata</i>           | MN905218.1 | MN851120.1 | MN850920.1 | MN851017.1 | MN852620.1 |
| Cerambycinae | Stenopterini   | <i>Stenopterius ater</i>            | MN905257.1 | MN851160.1 | MN850964.1 | MN851062.1 | MN852663.1 |
| Cerambycinae | Thraniini      | <i>Thranius simplex</i>             | KF737811.1 | KF737748.1 | KF141995.1 | -          | -          |
| Cerambycinae | Thraniini      | <i>Thranius variegatus</i>          | MN905260.1 | MN851164.1 | MN850968.1 | MN851066.1 | MN852667.1 |
| Cerambycinae | Tillomorphini  | <i>Centrotoclytus sp</i>            | MN905193.1 | MN851094.1 | MN850893.1 | MN850989.1 | MN852593.1 |
| Cerambycinae | Tillomorphini  | <i>Epipedocera abdominalis</i>      | MN905204.1 | MN851106.1 | MN850905.1 | MN851001.1 | MN852605.1 |
| Cerambycinae | Tillomorphini  | <i>Epipedocera vitalisi</i>         | MN905205.1 | MN851107.1 | MN850906.1 | -          | MN852606.1 |
| Cerambycinae | Trachyderini   | <i>Amarysius altajensis</i>         | MN905183.1 | -          | MN850883.1 | MN850978.1 | MN852582.1 |
| Cerambycinae | Trachyderini   | <i>Batyle suturalis</i>             | HQ984439.1 | -          | AF267407.1 | -          | -          |
| Cerambycinae | Trachyderini   | <i>Amarysius sanguinipennis</i>     | MN905184.1 | -          | -          | MN850979.1 | MN852583.1 |
| Cerambycinae | Trachyderini   | <i>Anoplistes halodendri</i>        | MW982817.1 | -          | -          | MN850983.1 | MN852587.1 |
| Cerambycinae | Trachyderini   | <i>Purpuricenus lituratus</i>       | -          | -          | MN850949.1 | MN851047.1 | MN852649.1 |

| Subfamily     | Tribe         | Species                         | COI        | 16S        | 18S        | 28S        | wingless   |
|---------------|---------------|---------------------------------|------------|------------|------------|------------|------------|
| Cerambycinae  | Trachyderini  | <i>Purpuricenus sideriger</i>   | KF737809.1 | KF737746.1 | KF141987.1 | -          | -          |
| Cerambycinae  | Trachyderini  | <i>Purpuricenus temminckii</i>  | MN905245.1 | MN851146.1 | MN850950.1 | MN851048.1 | MN852650.1 |
| Cerambycinae  | Plesioclytini | <i>Plesioclytus morrissi</i>    | this study | this study | this study | -          | -          |
| Cerambycinae  | Plesioclytini | <i>Plesioclytus relictus</i>    | this study | this study | this study | -          | -          |
| Cerambycinae  | Xystrocerini  | <i>Xystrocera globosa</i>       | KY357523.1 | KF737749.1 | KF141992.1 | MN851072.1 | MN852673.1 |
| Lamiinae      | Apomecynini   | <i>Ropica subnotata</i>         | KF737818.1 | KF737755.1 | KF141962.1 | -          | -          |
| Lamiinae      | Crossotini    | <i>Meochotypa diphysis</i>      | KU188504.1 | KF737760.1 | KC413666.1 | -          | -          |
| Lamiinae      | Lamiini       | <i>Lamiomimus gottschei</i>     | KY683726.1 | MN851114.1 | MN850913.1 | MN851010.1 | MN852613.1 |
| Lamiinae      | Mesosini      | <i>Mesosa irrorata</i>          | KF737833.1 | KF737770.1 | KF141974.1 | -          | -          |
| Lamiinae      | Monochamini   | <i>Monochamus subfasciatus</i>  | MZ057889.1 | MN851123.1 | MN850923.1 | MN851020.1 | MN852623.1 |
| Lamiinae      | Pteropliini   | <i>Pterolophia rigida</i>       | KF737836.1 | KF737773.1 | KF141963.1 | -          | -          |
| Lepturinae    | Lepturini     | <i>Leptura aurosericans</i>     | KF737783.1 | KF737720.1 | KF142007.1 | -          | -          |
| Lepturinae    | Lepturini     | <i>Oedecnema gebleri</i>        | MN905230.1 | MN851131.1 | MN850932.1 | MN851030.1 | MN852632.1 |
| Lepturinae    | Lepturini     | <i>Typocerus velutinus</i>      | KM846182.1 | AJ841410.1 | AJ841534.1 | -          | -          |
| Lepturinae    | Rhagiini      | <i>Gauromes tuberculicollis</i> | KF737784.1 | KF737721.1 | KF142006.1 | -          | -          |
| Lepturinae    | Rhagiini      | <i>Stenocorus amurensis</i>     | -          | MN851159.1 | MN850963.1 | MN851061.1 | MN852662.1 |
| Spondylidinae | Asemini       | <i>Arhopalus unicolor</i>       | KF737786.1 | KF737723.1 | KF141998.1 | -          | -          |
| Spondylidinae | Asemini       | <i>Asemum striatum</i>          | MN905191.1 | MN851092.1 | MN850891.1 | MN850987.1 | MN852591.1 |
